# Supplementary material for: Spatial variability of seasonal precipitation lapse rates in complex topographical regions – application in France
Source: Copernicus journal article supplement (doi:10.5194/egusphere-2023-3124), 2024-01-04
Supplement: Supplementary file [file egusphere-2023-3124-AC3-supplement.pdf]

## Reviewer #3

#RC3.1 Based on my personal reading, I find the paper interesting and containing detailed and well-conducted analysis.

We thank the reviewer for this overall positive opinion on this study and his constructive comments.

#RC3.2 With many analyses done (many precipitation products, massif scale, catchment scale), I know you have many results to describe. But I find it difficult to not be lost while reading sections 4 and 5, and difficult to get the picture of the main findings. I suggest to, for example, split section 4.1 in two parts (for example, the second focusing just on the 4 products, from line 340), or to clearly summarize the main conclusions at the end of each sub-section (as done for example at lines 369-377).

Thank you for this recommendation which has also been made by the other reviewers. This is a good suggestion and we will add key messages wherever it is necessary.

#RC3.3 If possible, I suggest to increase the size of some figures and text in figures. It's difficult to distinguish lines or read the text in: Figure 1a, Figure 3 (very difficult to distinguish the lines), Figure 6a,b (name of massif and numbers are very small; maybe it could help to have a table listing names, values of  $R^2$  and PLR, and just number in the figure to identify the massif in the list)

We thank the reviewer for those suggestions. Figure 1 will be larger because we will remove extra white space between the sub-figures (see our response to comment #RC1.7). We also increased the size of the text in figure 1a. Figure 3 is of maximum size. We propose a new version of this figure to better distinguish the reference, which is the black line (see our response to comment #RC1.10). We will add a table listing names, values of  $R^2$  and PLR for figure 6a,b.

#RC3.4 Figure 1: "SAFRAN" name is mentioned in the caption, not in the text. What is it referring to?

Thank you for noticing this oversight. The 23 massifs are used in the precipitation reanalysis SAFRAN. However, mentioning this reanalysis is useless for the reader's understanding. We propose to remove SAFRAN.

#RC3.5 Figure 4: Is the comparison different in the different regions? Could it be possible to distinguish with colors the points for the different regions? Do they cluster? Is there a region more aligned with bisect? The precipitation products are represented by the

different columns, so maybe colors could be used for giving further information on the comparison in different regions.

We thank the reviewer for this suggestion. We agree that colors show redundant information, already provided by columns.

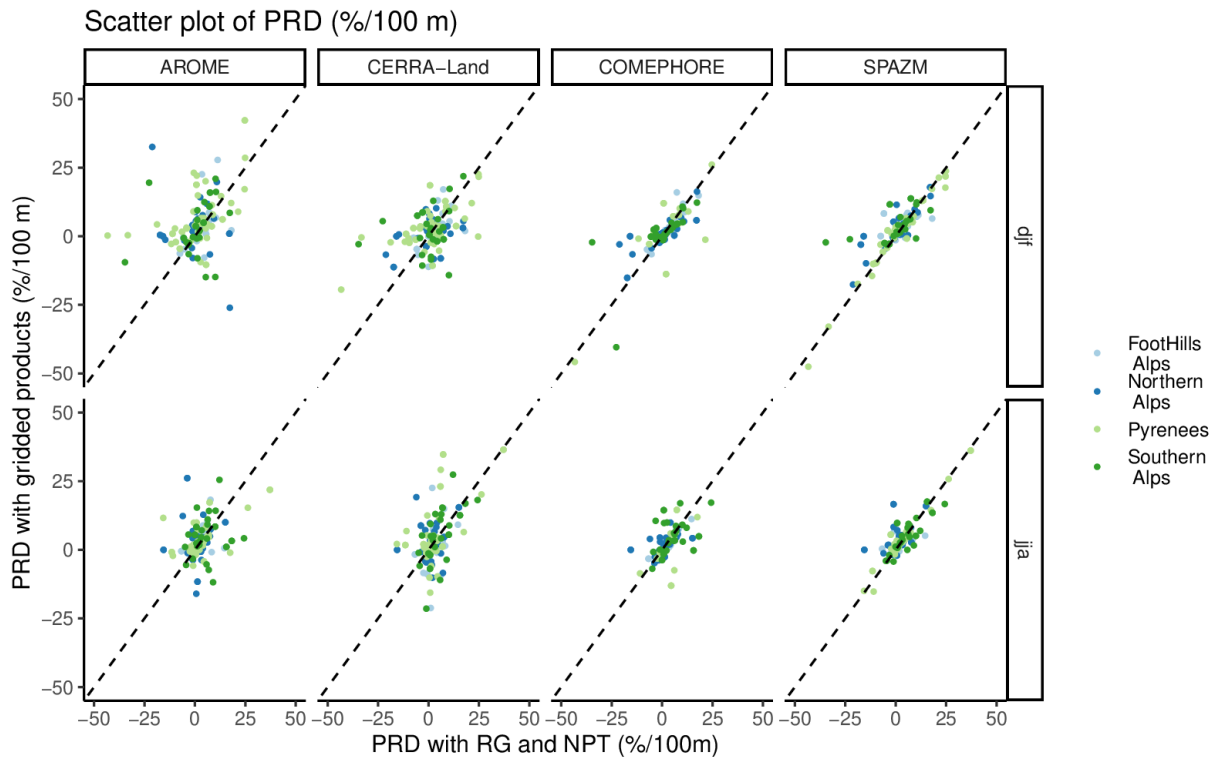

The subdivision of the points by region does not provide any supplementary information. The points do not cluster. We propose to keep the original figure 4 to conserve the color code by product and the graphical coherence between the figures.

#RC3.6 Figure 7: “insufficient altitudinal variability” should be when “standard deviation is lower than 50 m” (not higher)

Thank you for noticing this error. It will be corrected.

#RC3.7 Section 5.4. I suggest to move lines 512-523 and table 3 into the methodology section.

Thank you for this recommendation, l. 512-523 and table 3 will be moved into the methodology section. We also propose to move l. 524-534 and figure 9 into a third result subsection.

#RC3.8 Line 540: it's not clear to me the meaning of this sentence.

Thank you for detecting this unclear sentence which has been removed.
